# Supplementary material
Source: PubMed Central journal article supplement (PMC7688226)
Supplement: AEM.00583-20-s0001.pdf [file AEM.00583-20-s0001.pdf]

# Supplementary material

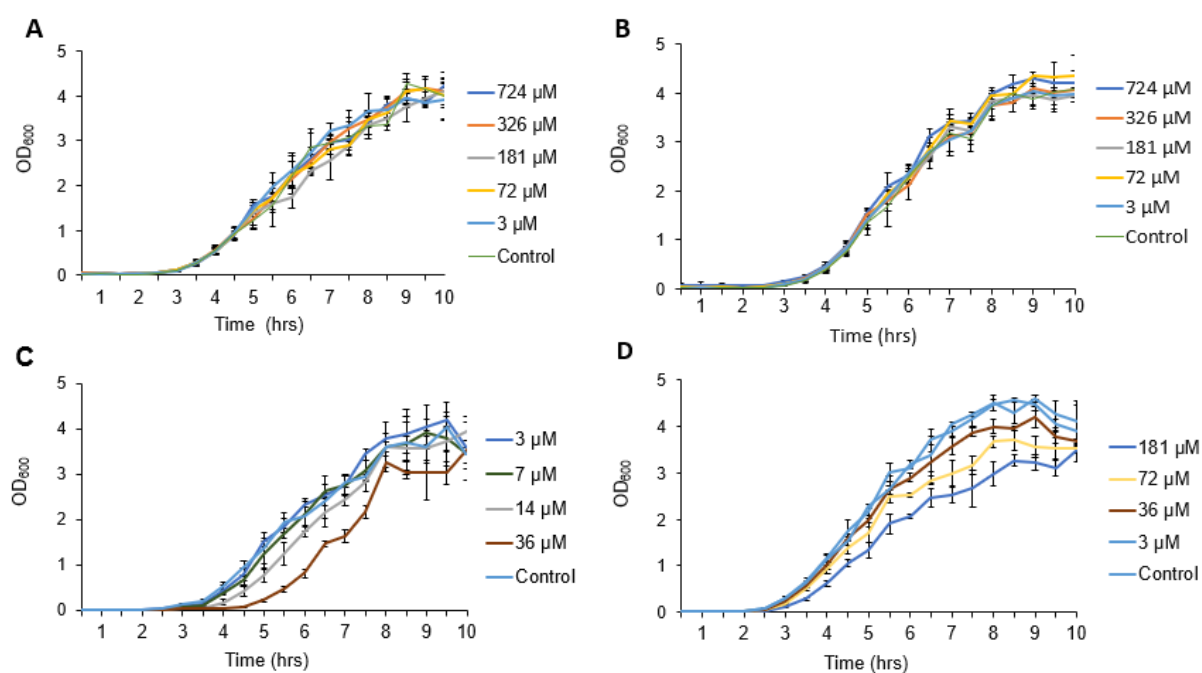

**Supplementary Figure 1.** The effect of vitamin K analogs on the growth/ increase in cell mass of EDL933. A) phylloquinone, B) menaquinone C) menadione, D) MSB. The solvents used for solubilization of the different vitamin K analogs were used as negative controls. DMSO was used at a concentration of 0.05%. Results are given as means of three independent experiments, with bars showing  $\pm$  standard deviation (SD). The statistics are shown in Table S2.

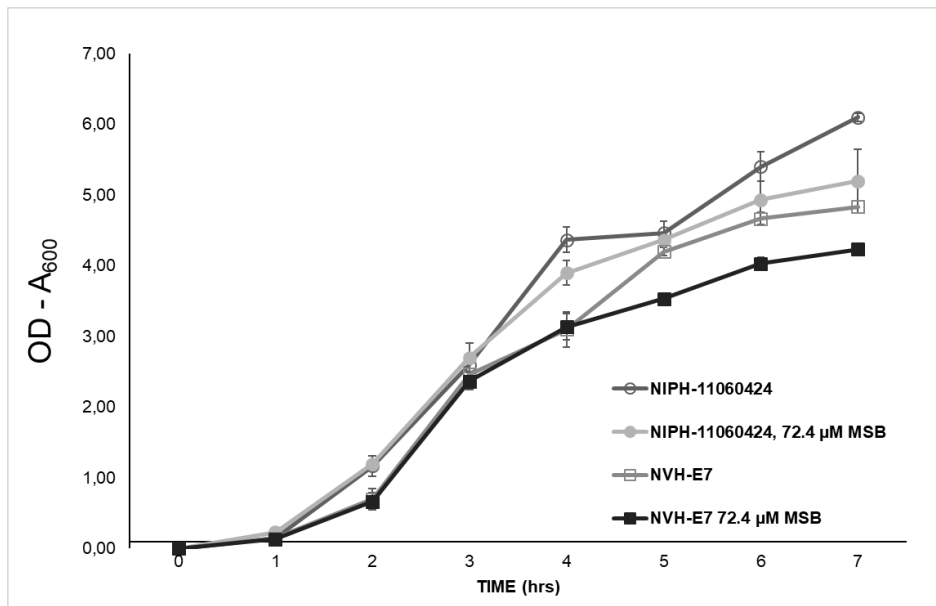

**Supplementary Figure 2.** The effect of 72  $\mu$ M MSB on growth of NIPH-11060424 and NVH-E7. Results are given as means of three independent experiments with bars showing  $\pm$  standard deviation (SD).

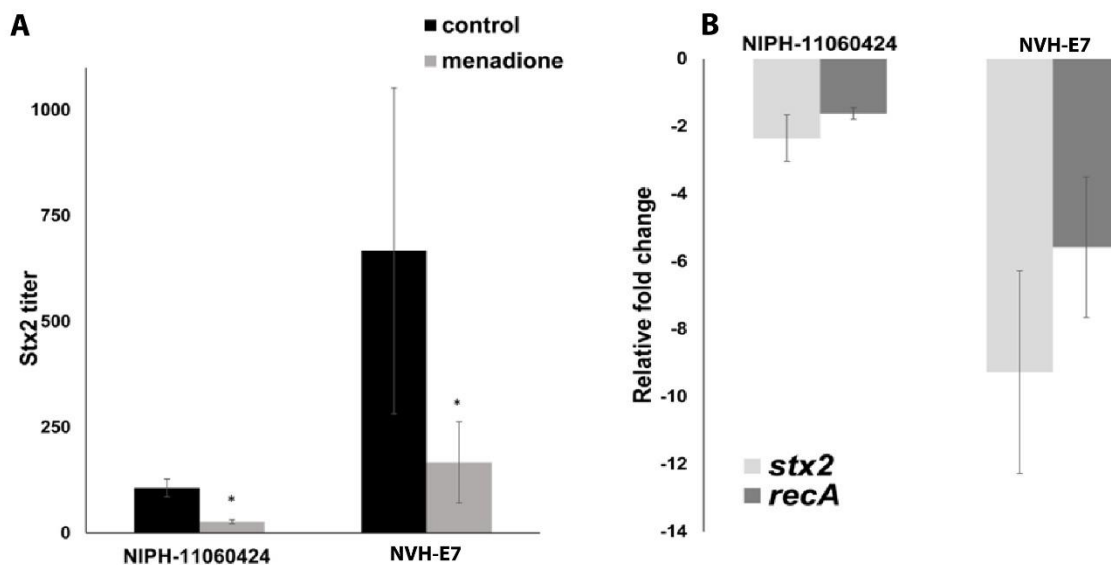

**Supplementary Figure 3.** (A) Stx2 titer produced by NIPH-11060424 and NVH-E7 in the presence or absence of 72  $\mu$ M MSB under induction with MMC. The error bars represent the standard error of the mean (SEM) of three independent experiments. An asterisk indicates statistically significant difference ( $p < 0.05$ ) in Stx levels (student's  $t$ -test). (B) Relative fold change in transcript levels of *stx2* and *recA* in MSB treated NIPH-11060424 and NVH-E7 cultures compared to untreated cultures under induction with MMC. The concentrations of MSB used was 72  $\mu$ M. Data represent mean of three individual experiments. The error bars represent the standard error of the mean (SEM) of three independent experiments.

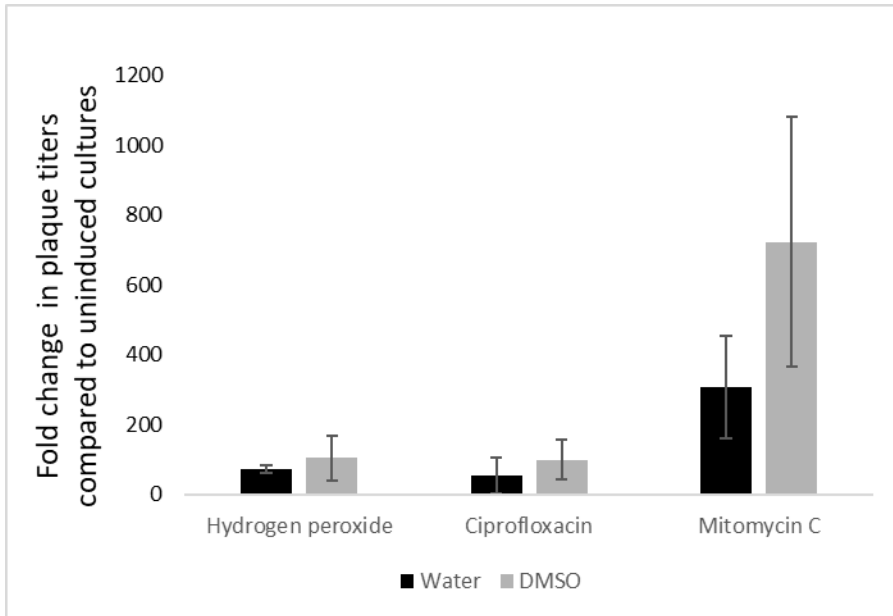

**Supplementary Figure 4.** Plaque production efficiency of BP933W when EDL933 was induced with either H<sub>2</sub>O<sub>2</sub>, ciprofloxacin or MMC. The columns represent fold change in plaque production relative to uninduced cultures (i.e., only water or DMSO added).

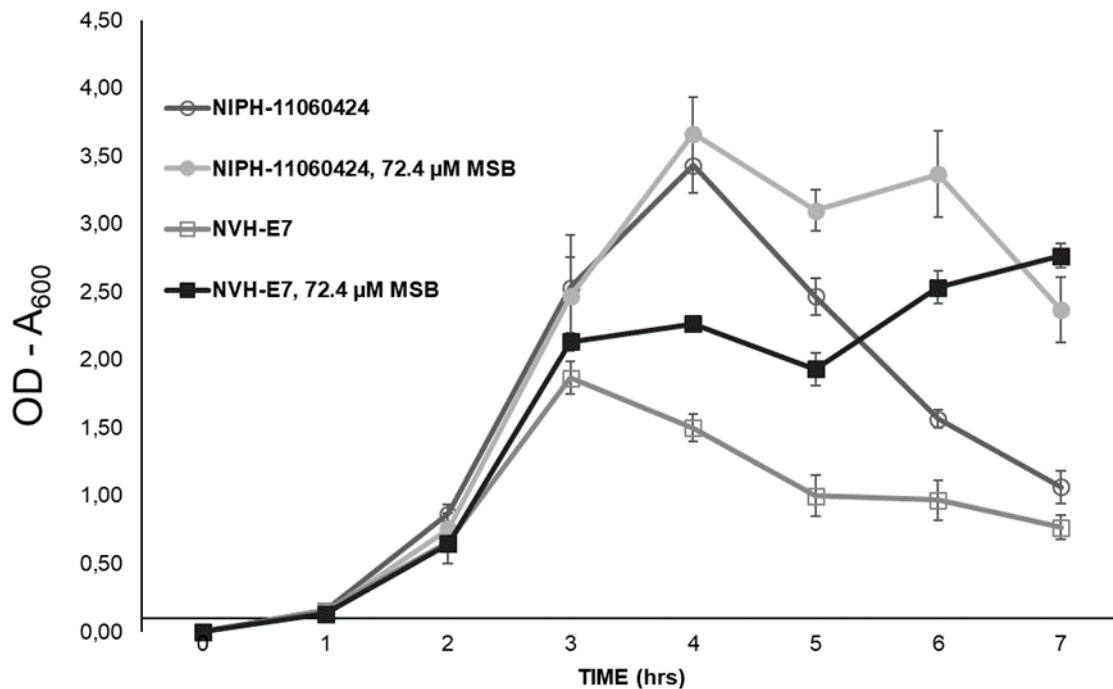

**Supplementary Figure 5.** The effect of 72 μM MSB on the survival of NIPH-11060424 and NVH-E7 after treatment with 0.5 μg/mL MMC at OD<sub>600</sub> = 0.5. Results are given as means of three independent experiments, with bars showing ± standard deviation (SD).

**Supplementary Table 1.** The maximum velocity ( $V_{max}$ ), the average, SD and P-values of EDL933 growth (as measured by counting CFU/mL) in the presence of different concentrations of phyloquinone, menaquinone, menadione and MSB. The  $V_{max}$  calculations were done with the Baranyi and Roberts model (1), with the Combase – DMFit software. The P-values were calculated with a paired student's *t*-test.

|             | DMSO control               |          |         | DMSO control             |          |         | DMSO control           |          |         | Water control    |          |         |
|-------------|----------------------------|----------|---------|--------------------------|----------|---------|------------------------|----------|---------|------------------|----------|---------|
| Time (hrs)  | Average                    | SD       | P-value | Average                  | SD       | P-value | Average                | SD       | P-value | Average          | SD       | P-value |
| 2           | 1.53E+07                   | 1.12E+07 |         | 1.12E+07                 | 2.16E+06 |         | 3.57E+07               | 8.73E+06 |         | 1.29E+07         | 4.84E+06 |         |
| 4           | 7.70E+08                   | 1.22E+08 |         | 9.61E+08                 | 5.73E+08 |         | 2.40E+09               | 9.66E+08 |         | 1.53E+09         | 1.29E+09 |         |
| 6           | 2.74E+09                   | 4.49E+08 |         | 5.80E+09                 | 4.64E+09 |         | 1.28E+10               | 1.79E+09 |         | 9.43E+09         | 3.68E+09 |         |
| 8           | 1.38E+09                   | 9.35E+08 |         | 2.00E+09                 | 4.90E+08 |         | 1.54E+09               | 5.09E+08 |         | 2.50E+09         | 5.52E+08 |         |
| 10          | 1.56E+09                   | 1.02E+09 |         | 2.80E+09                 | 7.12E+08 |         | 7.88E+09               | 7.47E+09 |         | 3.24E+09         | 2.05E+09 |         |
| <b>Vmax</b> | 9.96E+08                   | 1.79E+08 |         | 2.48E+09                 | 2.26E+09 |         | 5.41E+09               | 1.36E+09 |         | 4.15E+09         | 1.41E+09 |         |
|             | Phylloquinone 3.62 $\mu$ M |          |         | Menaquinone 3.62 $\mu$ M |          |         | Menadione 3.62 $\mu$ M |          |         | MSB 3.62 $\mu$ M |          |         |
| Time (hrs)  | Average                    | SD       | P-value | Average                  | SD       | P-value | Average                | SD       | P-value | Average          | SD       | P-value |
| 2           | 1.05E+07                   | 3.02E+06 | 0.466   | 7.99E+06                 | 3.80E+06 | 0.391   | 1.14E+07               | 2.03E+06 | 0.053   | 1.25E+07         | 3.59E+06 | 0.873   |
| 4           | 8.39E+08                   | 6.55E+07 | 0.450   | 6.00E+08                 | 2.87E+08 | 0.688   | 8.19E+08               | 1.30E+08 | 0.159   | 1.11E+09         | 6.66E+08 | 0.469   |
| 6           | 1.85E+09                   | 6.46E+08 | 0.213   | 2.17E+09                 | 1.24E+09 | 0.483   | 6.81E+09               | 3.22E+09 | 0.283   | 4.36E+09         | 2.30E+09 | 0.023   |
| 8           | 2.21E+09                   | 1.61E+09 | 0.561   | 2.01E+09                 | 4.96E+08 | 0.838   | 1.47E+09               | 4.56E+08 | 0.591   | 2.07E+09         | 4.32E+08 | 0.412   |
| 10          | 1.53E+09                   | 3.25E+08 | 0.942   | 3.68E+09                 | 5.86E+08 | 0.345   | 1.59E+09               | 2.89E+08 | 0.397   | 4.55E+09         | 2.56E+09 | 0.825   |
| <b>Vmax</b> | 1.04E+09                   | 4.46E+08 | 0.807   | 1.33E+09                 | 8.89E+07 | 0.815   | 3.47E+09               | 1.15E+09 | 0.886   | 2.43E+09         | 9.44E+08 | 0.253   |
|             | Phylloquinone 72.4 $\mu$ M |          |         | Menaquinone 72.4 $\mu$ M |          |         | Menadione 7.24 $\mu$ M |          |         | MSB 36.2 $\mu$ M |          |         |
| Time (hrs)  | Average                    | SD       | P-value | Average                  | SD       | P-value | Average                | SD       | P-value | Average          | SD       | P-value |
| 2           | 1.03E+07                   | 5.02E+06 | 0.61    | 8.83E+06                 | 4.04E+06 | 0.275   | 2.01E+07               | 2.08E+07 | 0.498   | 7.12E+06         | 2.79E+06 | 0.051   |
| 4           | 8.33E+08                   | 1.03E+08 | 0.28    | 6.36E+08                 | 3.02E+08 | 0.675   | 8.53E+08               | 5.86E+07 | 0.224   | 4.94E+08         | 3.50E+08 | 0.173   |
| 6           | 2.82E+09                   | 1.80E+09 | 0.92    | 2.19E+09                 | 1.22E+09 | 0.324   | 3.71E+09               | 1.03E+09 | 0.059   | 2.78E+09         | 1.62E+09 | 0.014   |
| 8           | 1.63E+09                   | 6.24E+08 | 0.64    | 1.78E+09                 | 4.20E+08 | 0.143   | 1.43E+09               | 7.94E+08 | 0.528   | 1.78E+09         | 5.95E+08 | 0.427   |
| 10          | 1.61E+09                   | 7.32E+08 | 0.79    | 2.32E+09                 | 8.29E+08 | 0.307   | 3.30E+09               | 4.28E+09 | 0.679   | 1.29E+09         | 1.62E+08 | 0.197   |
| <b>Vmax</b> | 1.84E+09                   | 8.28E+08 | 0.23    | 1.02E+09                 | 5.08E+08 | 0.365   | 1.14E+09               | 5.41E+08 | 0.247   | 1.84E+09         | 5.85E+08 | 0.036   |
|             | Phylloquinone 181 $\mu$ M  |          |         | Menaquinone 181 $\mu$ M  |          |         | Menadione 14.4 $\mu$ M |          |         | MSB 72.4 $\mu$ M |          |         |
| Time (hrs)  | Average                    | SD       | P-value | Average                  | SD       | P-value | Average                | SD       | P-value | Average          | SD       | P-value |
| 2           | 1.60E+07                   | 1.08E+07 | 0.489   | 8.53E+06                 | 4.15E+06 | 0.225   | 1.06E+07               | 5.84E+06 | 0.022   | 5.82E+06         | 4.56E+06 | 0.017   |
| 4           | 5.70E+08                   | 1.66E+08 | 0.129   | 6.76E+08                 | 3.62E+08 | 0.844   | 7.14E+08               | 2.30E+08 | 0.138   | 3.49E+08         | 2.67E+08 | 0.147   |
| 6           | 2.61E+09                   | 1.02E+09 | 0.888   | 1.93E+09                 | 1.37E+09 | 0.266   | 4.73E+09               | 2.77E+09 | 0.438   | 1.88E+09         | 1.22E+09 | 0.016   |
| 8           | 1.52E+09                   | 6.51E+08 | 0.851   | 4.96E+09                 | 4.49E+09 | 0.438   | 1.25E+09               | 6.28E+08 | 0.953   | 1.58E+09         | 5.25E+08 | 0.034   |
| 10          | 4.88E+09                   | 6.00E+09 | 0.451   | 1.94E+09                 | 4.43E+08 | 0.083   | 1.17E+09               | 7.38E+08 | 0.387   | 1.70E+09         | 1.05E+09 | 0.086   |
| <b>Vmax</b> | 1.06E+09                   | 6.15E+08 | 0.898   | 2.28E+09                 | 2.12E+09 | 0.605   | 2.13E+09               | 1.57E+09 | 0.519   | 1.03E+09         | 4.92E+08 | 0.032   |
|             | Phylloquinone 362 $\mu$ M  |          |         | Menaquinone 362 $\mu$ M  |          |         | Menadione 36.2 $\mu$ M |          |         | MSB 181. $\mu$ M |          |         |
| Time (hrs)  | Average                    | SD       | P-value | Average                  | SD       | P-value | Average                | SD       | P-value | Average          | SD       | P-value |
| 2           | 1.75E+07                   | 7.30E+06 | 0.427   | 1.14E+07                 | 5.49E+05 | 0.911   | 5.19E+06               | 2.50E+06 | 0.026   | 3.42E+06         | 2.72E+06 | 0.013   |
| 4           | 7.70E+08                   | 1.68E+08 | 1.000   | 6.61E+08                 | 3.30E+08 | 0.206   | 1.93E+08               | 1.37E+08 | 0.072   | 1.84E+08         | 2.03E+08 | 0.186   |
| 6           | 1.92E+09                   | 1.03E+09 | 0.135   | 3.31E+09                 | 2.61E+09 | 0.197   | 1.53E+09               | 6.34E+08 | 0.021   | 1.17E+09         | 3.54E+08 | 0.101   |
| 8           | 1.87E+09                   | 1.11E+09 | 0.242   | 2.04E+09                 | 2.49E+08 | 0.653   | 1.00E+09               | 6.84E+08 | 0.643   | 7.82E+08         | 6.59E+08 | 0.006   |
| 10          | 1.66E+09                   | 4.71E+08 | 0.831   | 5.25E+09                 | 4.23E+09 | 0.326   | 7.85E+08               | 5.78E+08 | 0.350   | 2.08E+09         | 2.07E+09 | 0.028   |
| <b>Vmax</b> | 1.14E+09                   | 8.51E+08 | 0.797   | 1.45E+09                 | 1.11E+09 | 0.268   | 7.49E+08               | 2.70E+08 | 0.189   | 8.52E+08         | 8.48E+08 | 0.031   |
|             | Phylloquinone 724 $\mu$ M  |          |         | Menaquinone 724 $\mu$ M  |          |         |                        |          |         |                  |          |         |
| Time (hrs)  | Average                    | SD       | P-value | Average                  | SD       | P-value |                        |          |         |                  |          |         |
| 2           | 1.97E+07                   | 1.64E+07 | 0.398   | 9.02E+06                 | 2.87E+05 | 0.414   |                        |          |         |                  |          |         |
| 4           | 6.00E+08                   | 1.10E+08 | 0.117   | 5.67E+08                 | 1.29E+08 | 0.640   |                        |          |         |                  |          |         |
| 6           | 2.07E+09                   | 9.35E+08 | 0.803   | 1.86E+09                 | 1.07E+09 | 0.357   |                        |          |         |                  |          |         |
| 8           | 1.44E+09                   | 7.65E+08 | 0.523   | 2.18E+09                 | 5.84E+08 | 0.541   |                        |          |         |                  |          |         |
| 10          | 2.00E+09                   | 8.20E+08 | 0.259   | 2.05E+09                 | 4.44E+08 | 0.288   |                        |          |         |                  |          |         |
| <b>Vmax</b> | 7.47E+08                   | 4.23E+08 | 0.040   | 1.68E+09                 | 5.68E+08 | 0.607   |                        |          |         |                  |          |         |

**Supplementary Table 2.** The maximum velocity ( $V_{\max}$ ), the average, SD and P-values of EDL933 cell mass (as measured by  $OD_{600}$ ) during growth in the presence of different concentrations of phylloquinone, menaquinone, menadione and MSB. The  $V_{\max}$  calculations were done with the Baranyi and Roberts model (1), with the Combase – DMFit software. The P-values were calculated with a paired student's  $t$ -test.

| <b>Phylloquinone</b>            |      |      |      |      |      |       |
|---------------------------------|------|------|------|------|------|-------|
| Concentration ( $\mu\text{M}$ ) | 724  | 362  | 181  | 72.4 | 3.62 | DMSO  |
| $V_{\max}$ (mean)               | 0.85 | 0.82 | 0.73 | 0.76 | 0.93 | 0.77  |
| SD                              | 0.10 | 0.06 | 0.08 | 0.03 | 0.14 | 0.03  |
| P-value                         | 0.23 | 0.10 | 0.48 | 0.73 | 0.26 |       |
| <b>Menaquinone</b>              |      |      |      |      |      |       |
| Concentration ( $\mu\text{M}$ ) | 724  | 362  | 181  | 72.4 | 3.62 | DMSO  |
| $V_{\max}$ (mean)               | 1.01 | 0.91 | 0.95 | 0.99 | 0.93 | 0.96  |
| SD                              | 0.04 | 0.09 | 0.01 | 0.03 | 0.06 | 0.00  |
| P-value                         | 0.18 | 0.57 | 0.80 | 0.18 | 0.62 |       |
| <b>Menadione</b>                |      |      |      |      |      |       |
| Concentration ( $\mu\text{M}$ ) |      | 36.2 | 14.4 | 7.24 | 3.62 | DMSO  |
| $V_{\max}$ (mean)               |      | 1.10 | 0.95 | 0.91 | 0.87 | 0.80  |
| SD                              |      | 0.05 | 0.04 | 0.03 | 0.05 | 0.07  |
| P-value                         |      | 0.06 | 0.06 | 0.06 | 0.33 |       |
| <b>MSB</b>                      |      |      |      |      |      |       |
| Concentration ( $\mu\text{M}$ ) |      | 181  | 72.4 | 36.2 | 3.62 | Water |
| $V_{\max}$ (mean)               |      | 0.78 | 0.80 | 0.98 | 1.09 | 1.12  |
| SD                              |      | 0.07 | 0.05 | 0.04 | 0.03 | 0.05  |
| P-value                         |      | 0.00 | 0.01 | 0.10 | 0.37 |       |

**Supplementary Table 3.** The average, SD and P-values of EDL933 Stx2 production (ng/mL), measured by LC/MS technology, during inoculation with different concentrations of phylloquinone, menaquinone, menadione and MSB. The P-values were calculated with a paired student's t-test.

|                            | Stx produced (ng/mL) |                   |       |         |               |       |         |             |       |         |
|----------------------------|----------------------|-------------------|-------|---------|---------------|-------|---------|-------------|-------|---------|
|                            | Time (hrs)           | Hydrogen peroxide |       |         | Ciprofloxacin |       |         | Mitomycin C |       |         |
|                            |                      | Average           | SD    | P-value | Average       | SD    | P-value | Average     | SD    | P-value |
| Water control              | 6                    | 50.82             | 8.65  |         | 164.06        | 42.45 |         | 125.71      | 19.10 |         |
|                            | 8                    | 76.26             | 2.48  |         | 202.36        | 15.17 |         | 167.18      | 26.34 |         |
|                            | 20                   | 120.94            | 2.17  |         | 329.05        | 50.76 |         | 297.71      | 87.46 |         |
| DMSO control               | 6                    | 30.31             | 11.21 |         | 91.35         | 27.87 |         | 72.98       | 14.05 |         |
|                            | 8                    | 56.06             | 10.86 |         | 173.83        | 51.97 |         | 117.97      | 28.78 |         |
|                            | 20                   | 88.11             | 18.14 |         | 308.28        | 59.31 |         | 200.04      | 37.06 |         |
| Phylloquinone, 72 $\mu$ M  | 6                    | 45.91             | 0.70  | 0.203   | 142.58        | 12.17 | 0.109   | 51.46       | 7.99  | 0.273   |
|                            | 8                    | 64.70             | 2.98  | 0.401   | 234.32        | 23.01 | 0.122   | 76.97       | 4.42  | 0.210   |
|                            | 20                   | 82.12             | 18.63 | 0.823   | 386.74        | 20.74 | 0.111   | 128.47      | 2.74  | 0.107   |
| Phylloquinone, 181 $\mu$ M | 6                    | 20.80             | 10.52 | 0.257   | 68.30         | 3.32  | 0.339   | 56.98       | 5.75  | 0.367   |
|                            | 8                    | 34.33             | 13.47 | 0.220   | 107.52        | 8.09  | 0.254   | 83.88       | 4.72  | 0.257   |
|                            | 20                   | 43.21             | 14.79 | 0.189   | 188.75        | 5.34  | 0.100   | 169.21      | 33.05 | 0.597   |
| Menaquinone, 72 $\mu$ M    | 6                    | 21.17             | 13.76 | 0.290   | 36.15         | 6.02  | 0.147   | 49.44       | 4.29  | 0.076   |
|                            | 8                    | 42.84             | 20.65 | 0.200   | 89.95         | 13.49 | 0.212   | 88.30       | 4.87  | 0.225   |
|                            | 20                   | 51.98             | 19.13 | 0.213   | 210.58        | 7.09  | 0.124   | 131.60      | 3.97  | 0.137   |
| Menaquinone, 181 $\mu$ M   | 6                    | 7.92              | 0.82  | 0.095   | 102.14        | 10.19 | 0.588   | 97.16       | 3.23  | 0.180   |
|                            | 8                    | 31.78             | 2.32  | 0.070   | 160.01        | 15.15 | 0.683   | 137.05      | 20.29 | 0.612   |
|                            | 20                   | 45.25             | 25.66 | 0.298   | 295.57        | 17.68 | 0.730   | 215.33      | 3.26  | 0.633   |
| Menadione, 7 $\mu$ M       | 6                    | 13.99             | 1.52  | 0.202   | 81.44         | 20.17 | 0.555   | 73.85       | 4.17  | 0.936   |
|                            | 8                    | 21.89             | 7.13  | 0.104   | 127.22        | 9.48  | 0.341   | 101.04      | 2.21  | 0.520   |
|                            | 20                   | 33.71             | 2.58  | 0.039   | 235.18        | 23.02 | 0.105   | 152.95      | 4.19  | 0.243   |
| MSB, 36 $\mu$ M            | 6                    | 8.18              | 1.38  | 0.019   | 57.99         | 12.61 | 0.042   | 73.69       | 7.62  | 0.109   |
|                            | 8                    | 9.09              | 3.01  | 0.000   | 78.71         | 8.42  | 0.008   | 83.32       | 21.42 | 0.024   |
|                            | 20                   | 15.85             | 2.14  | 0.000   | 171.22        | 11.54 | 0.057   | 175.79      | 46.09 | 0.285   |

**Supplementary Table 4.** The average, SD and P-values of EDL933 Stx production (ng/mL), measured by LC/MS technology, during inoculation with two different concentrations of phyloquinone and menaquinone. The P-values were calculated with a paired student's t-test.

|               | Time (hrs) | Inducing agent | 72 $\mu$ M |       | 181 $\mu$ M |       | P-value |
|---------------|------------|----------------|------------|-------|-------------|-------|---------|
|               |            |                | Average    | SD    | Average     | SD    |         |
| Phylloquinone | 6          | H2O2           | 45.91      | 0.70  | 20.80       | 10.52 | 0.087   |
|               | 8          |                | 64.70      | 2.98  | 34.33       | 13.47 | 0.055   |
|               | 20         |                | 82.12      | 18.63 | 43.21       | 14.79 | 0.026   |
|               | 6          | Ciprofloxacin  | 142.58     | 12.17 | 68.30       | 3.32  | 0.007   |
|               | 8          |                | 234.32     | 23.01 | 107.52      | 8.09  | 0.024   |
|               | 20         |                | 386.74     | 20.74 | 188.75      | 5.34  | 0.006   |
|               | 6          | MMC            | 51.46      | 7.99  | 56.98       | 5.75  | 0.421   |
|               | 8          |                | 76.97      | 4.42  | 83.88       | 4.72  | 0.342   |
|               | 20         |                | 128.47     | 2.74  | 169.21      | 33.05 | 0.234   |
| Menaquinone   | 6          | H2O2           | 21.17      | 13.76 | 7.92        | 0.82  | 0.300   |
|               | 8          |                | 42.84      | 20.65 | 31.78       | 2.32  | 0.499   |
|               | 20         |                | 51.98      | 19.13 | 45.25       | 25.66 | 0.802   |
|               | 6          | Ciprofloxacin  | 36.15      | 6.02  | 102.14      | 10.19 | 0.026   |
|               | 8          |                | 89.95      | 13.49 | 160.01      | 15.15 | 0.066   |
|               | 20         |                | 210.58     | 7.09  | 295.57      | 17.68 | 0.008   |
|               | 6          | MMC            | 49.44      | 4.29  | 97.16       | 3.23  | 0.011   |
|               | 8          |                | 88.30      | 4.87  | 137.05      | 20.29 | 0.095   |
|               | 20         |                | 131.60     | 3.97  | 215.33      | 3.26  | 0.000   |

**Supplementary Table 5.** The average, the SD and P-values of EDL933 growth, measured by plating and enumeration of CFU/mL, while inoculated with different concentrations of phyloquinone, menaquinone, menadione and MSB and induced with H<sub>2</sub>O<sub>2</sub>. The P-values were calculated with the paired student's *t*-test. Water is the control for MSB, and DMSO is the control for phyloquinone, menaquinone and menadione.

| Time (hrs) | Water control |          |         | DMSO control |          |         | Menaquinone |          |         |
|------------|---------------|----------|---------|--------------|----------|---------|-------------|----------|---------|
|            | Average       | SD       | P-value | average      | SD       | P-value | Average     | SD       | P-value |
| 0          | 5.76E+05      | 0        |         | 5.76E+05     | 0        |         | 5.76E+05    | 0        |         |
| 3          | 2.91E+08      | 1.09E+08 |         | 9.95E+07     | 6.18E+07 |         | 1.10E+08    | 6.35E+07 | 0.644   |
| 5          | 3.36E+07      | 2.68E+07 |         | 5.75E+06     | 2.74E+06 |         | 1.57E+06    | 1.51E+06 | 0.192   |
| 7          | 2.65E+08      | 1.81E+08 |         | 1.24E+08     | 7.25E+07 |         | 1.45E+07    | 1.29E+07 | 0.205   |
| 9          | 1.47E+09      | 1.37E+09 |         | 1.39E+09     | 5.31E+08 |         | 6.10E+07    | 8.21E+07 | 0.056   |
| 11         | 2.79E+09      | 7.53E+08 |         | 2.86E+09     | 5.62E+08 |         | 1.97E+09    | 1.10E+09 | 0.273   |
|            | Menaquinone   |          |         | Menadione    |          |         | MSB         |          |         |
|            | Average       | SD       | P-value | average      | SD       | p-value | average     | Sd       | P-value |
| 0          | 575765.2      | 0        |         | 5.76E+05     | 0        |         | 5.76E+05    | 0        |         |
| 3          | 1.10E+08      | 6.35E+07 | 0.644   | 1.14E+08     | 4.97E+07 | 0.764   | 3.02E+08    | 1.18E+08 | 0.684   |
| 5          | 1.57E+06      | 1.51E+06 | 0.192   | 1.21E+09     | 9.15E+08 | 0.203   | 2.23E+09    | 1.80E+08 | 0.004   |
| 7          | 1.45E+07      | 1.29E+07 | 0.205   | 7.07E+08     | 4.49E+08 | 0.245   | 5.67E+09    | 1.02E+09 | 0.019   |
| 9          | 6.10E+07      | 8.21E+07 | 0.056   | 2.19E+09     | 2.15E+08 | 0.216   | 2.65E+09    | 1.24E+09 | 0.561   |
| 11         | 1.97E+09      | 1.10E+09 | 0.273   | 3.09E+09     | 5.92E+08 | 0.727   | 5.07E+10    | 4.55E+10 | 0.279   |



**Supplementary Table 6.** The maximum velocity ( $V_{max}$ ), the SD and P-values of EDL933 growth in the presence different concentrations of phylloquinone, menaquinone, menadione and MSB under induction with  $H_2O_2$ , MMC and Ciprofloxacin.  $V_{max}$  was calculated, for both the growth and the death phase for Ciprofloxacin and MMC, and for the growth phase for  $H_2O_2$ , using the Baranyi and Roberts model (1), with the Combase – DMFit software. The P-values were calculated with the paired student's *t*-test. Water is the control for DMSO an MSB, and DMSO is the control for phylloquinone, menaquinone and menadione.

|                                |                  | <b>Water</b> | <b>DMSO</b> | <b>Phylloquinone</b> | <b>Menaquinone</b> | <b>Menadione</b> | <b>MSB</b> |
|--------------------------------|------------------|--------------|-------------|----------------------|--------------------|------------------|------------|
| Hydrogen peroxide              | $V_{max}$ (mean) | 0.15         | 0.20        | 0.23                 | 0.29               | 0.38             | 0.63       |
|                                | SD               | 0.09         | 0.13        | 0.16                 | 0.17               | 0.10             | 0.05       |
|                                | P-value          |              | 0.62        | 0.63                 | 0.19               | 0.20             | 0.04       |
| MMC,<br>growth phase           | $V_{max}$ (mean) | 0.91         | 0.88        | 0.89                 | 0.90               | 0.92             | 0.91       |
|                                | SD               | 0.02         | 0.09        | 0.04                 | 0.05               | 0.07             | 0.06       |
|                                | P- value         |              | 0.57        | 0.87                 | 0.51               | 0.48             | 0.97       |
| MMC,<br>death phase            | $V_{max}$ (mean) | -1.29        | -1.38       | -1.29                | -1.17              | -1.27            | -0.95      |
|                                | SD               | 0.31         | 0.12        | 0.07                 | 0.18               | 0.24             | 0.12       |
|                                |                  |              | 0.63        | 0.20                 | 0.24               | 0.70             | 0.20       |
| Ciprofloxacin,<br>growth phase | $V_{max}$ (mean) | 1.31         | 1.17        | 1.20                 | 1.38               | 1.23             | 0.92       |
|                                | SD               | 0.08         | 0.05        | 0.07                 | 0.21               | 0.27             | 0.05       |
|                                | P- value         |              | 0.26        | 0.09                 | 0.36               | 0.82             | 0.01       |
| Ciprofloxacin,<br>death phase  | $V_{max}$ (mean) | -1.39        | -1.97       | -1.18                | -1.13              | -1.54            | -1.67      |
|                                | SD               | 0.21         | 0.32        | 0.22                 | 0.03               | 0.16             | 0.20       |
|                                | P- value         |              | 0.25        | 0.17                 | 0.07               | 0.30             | 0.34       |

#### References:

1. Baranyi J, Roberts TA. 1994. A dynamic approach to predicting bacterial growth in food. Int J Food Microbiol 23:277-94.
